# Supplementary material
Source: PubMed Central journal article supplement (PMC3447399)
Supplement: cn300049m_si_001.pdf [file cn300049m_si_001.pdf]

## Supplementary Information

**Table S1:**  $B_{max}$  values for [ $^3$ H]DAMGO using saturation radioligand binding in HEK-293 cells stably expressing mu, mu-kappa, and mu-delta opioid receptors.

| Cell Type | $B_{max}$ (fmol/mg) |
|-----------|---------------------|
| mu        | 129.5 $\pm$ 30.4    |
| mu-kappa  | 104.4 $\pm$ 25.7    |
| mu-delta  | 141.1 $\pm$ 34.4    |

Data shown as Mean  $\pm$  SEM (n = 3)

**Table S2:** Mean Dose ratios (ED50 of mu agonist in presence of naltrindole  $\div$  ED50 of mu agonist alone) and (95% confidence limits) for morphine, fentanyl, and methadone after pretreatment with the delta-opioid antagonist naltrindole in rhesus monkeys. \*

Asterisk indicates that 95% confidence limits do not overlap compared to methadone within a naltrindole dose.

| Naltrindole Dose | Morphine             | Fentanyl             | Methadone          |
|------------------|----------------------|----------------------|--------------------|
| 0.1 mg/kg        | 0.96 (0.53 – 1.39)   | 1.08 (0.70 – 1.46)   | Not Determined     |
| 0.32 mg/kg       | 1.65 (1.20 – 2.11)   | 1.56 (1.23 – 1.89)   | 1.21 (0.93 – 1.48) |
| 1.0 mg/kg        | 2.22 (1.69 – 2.75) * | 2.96 (1.79 – 4.12) * | 1.25 (1.09 – 1.41) |
| 3.2 mg/kg        | 5.88 (4.41 – 7.35) * | 4.53 (2.86 – 6.19) * | 2.44 (2.23 – 2.65) |
